# Supplementary material for: Weak covalent interactions and anionic charge-sharing polymerisation in cluster environments
Source: Royal Society of Chemistry journal article supplement (doi:10.1039/d1cp01213d), 2021-01-01
Supplement: d1cp01213d1.pdf [file d1cp01213d1.pdf]

# **Weak covalent interactions and anionic polymerisation in cluster environments**

Supplementary information

Yerbolat Dauletyarov and Andrei Sanov \*

Department of Chemistry and Biochemistry, The University of Arizona, Tucson, AZ 85721,  
U.S.A.

\* Email: [sanov@arizona.edu](mailto:sanov@arizona.edu)

## **COMPUTATIONAL DETAILS**

All structures reported here were optimised using the QChem 5.1 program package, with the Minnesota-06 (M06-2X) functional and Dunning's augmented correlation-consistent basis set of double-zeta quality (aug-cc-pVDZ). The geometry optimisations were carried out under the stated symmetry constraints. In cluster cases, complete explorations of the geometry space were not attempted; hence, the structures shown do not necessarily correspond to global potential minima. See the main article text for details and explanation.

## STRUCTURES SHOWN IN FIG. 4 OF THE MAIN ARTICLE

The perspectives and orientations in the following figures are not the same as in main article's Fig. 4.

### Glyoxal monomer anion, $gl^-$ ( $C_{2h}$ symmetry point group)

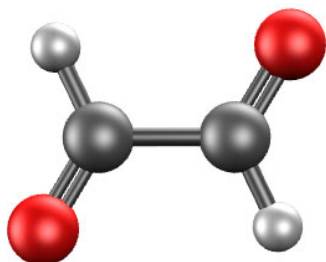

| ATOM | Coordinates (Angstroms) |               |              |
|------|-------------------------|---------------|--------------|
|      | X                       | Y             | Z            |
| 1 C  | 0.6149153686            | -0.3632781750 | 0.0000000000 |
| 2 C  | -0.6149153686           | 0.3632781750  | 0.0000000000 |
| 3 O  | 1.7727924620            | 0.1465066996  | 0.0000000000 |
| 4 H  | 0.4894421655            | -1.4723690303 | 0.0000000000 |
| 5 O  | -1.7727924620           | -0.1465066996 | 0.0000000000 |
| 6 H  | -0.4894421655           | 1.4723690303  | 0.0000000000 |

### Biacetyl monomer anion, $ba^-$ ( $C_{2h}$ symmetry point group)

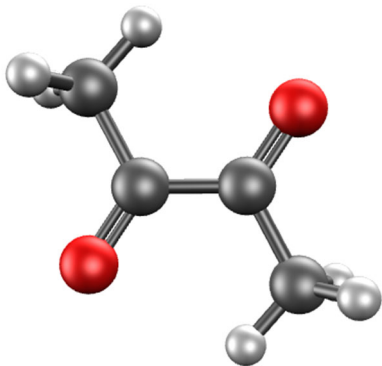

| ATOM | Coordinates (Angstroms) |               |               |
|------|-------------------------|---------------|---------------|
|      | X                       | Y             | Z             |
| 1 C  | 0.6556135688            | 0.2979035805  | -0.0000000000 |
| 2 O  | 0.8652501126            | 1.5498097028  | -0.0000000000 |
| 3 C  | -0.6556135688           | -0.2979035805 | -0.0000000000 |
| 4 O  | -0.8652501126           | -1.5498097028 | 0.0000000000  |
| 5 C  | -1.8505182437           | 0.6427949872  | -0.0000000000 |
| 6 H  | -1.5269980317           | 1.6890705606  | -0.0000000000 |
| 7 H  | -2.4723103480           | 0.4415730840  | -0.8857931777 |
| 8 H  | -2.4723103480           | 0.4415730840  | 0.8857931777  |
| 9 C  | 1.8505182437            | -0.6427949872 | 0.0000000000  |
| 10 H | 1.5269980317            | -1.6890705606 | 0.0000000000  |
| 11 H | 2.4723103480            | -0.4415730840 | -0.8857931777 |
| 12 H | 2.4723103480            | -0.4415730840 | 0.8857931777  |

**Glyoxal dimer anion, (gl)<sub>2</sub><sup>-</sup> (*D*<sub>2</sub> symmetry point group)**

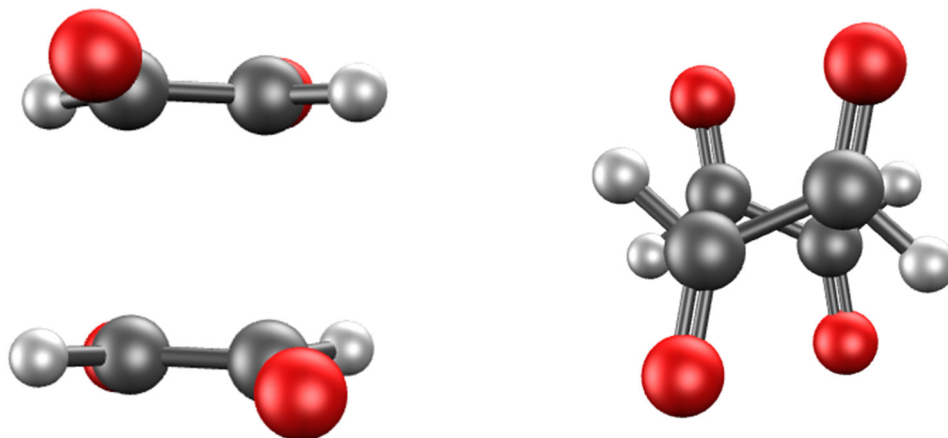

|      |   | Coordinates (Angstroms) |               |               |
|------|---|-------------------------|---------------|---------------|
| ATOM |   | X                       | Y             | Z             |
| 1    | C | -1.3035539624           | 0.3020213169  | 0.6768920260  |
| 2    | C | -1.3035539624           | -0.3020213169 | -0.6768920260 |
| 3    | O | -1.4469127028           | 1.5074895006  | 0.8784868618  |
| 4    | H | -1.2522308496           | -0.4370903796 | 1.5050246429  |
| 5    | O | -1.4469127028           | -1.5074895006 | -0.8784868618 |
| 6    | H | -1.2522308496           | 0.4370903796  | -1.5050246429 |
| 7    | C | 1.3035539624            | 0.3020213169  | -0.6768920260 |
| 8    | C | 1.3035539624            | -0.3020213169 | 0.6768920260  |
| 9    | O | 1.4469127028            | 1.5074895006  | -0.8784868618 |
| 10   | H | 1.2522308496            | -0.4370903796 | -1.5050246429 |
| 11   | O | 1.4469127028            | -1.5074895006 | 0.8784868618  |
| 12   | H | 1.2522308496            | 0.4370903796  | 1.5050246429  |

**Biacetyl dimer anion, (ba)<sub>2</sub><sup>-</sup> (C<sub>2</sub> symmetry point group)**

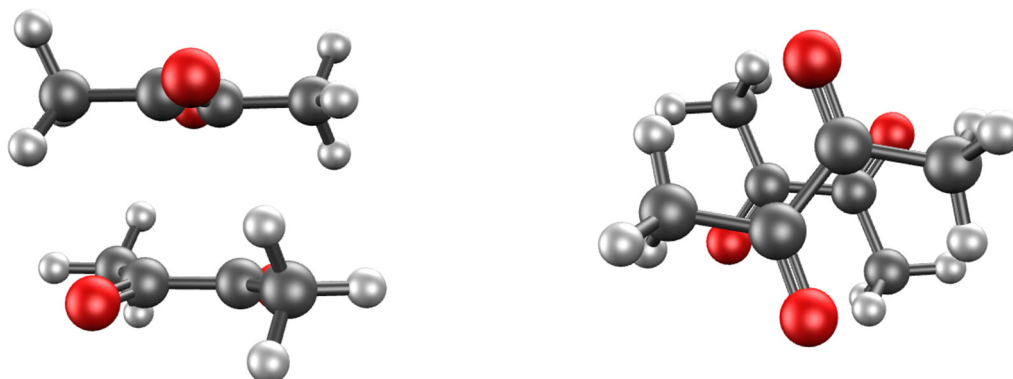

| ATOM |   | Coordinates (Angstroms) |               |               |
|------|---|-------------------------|---------------|---------------|
|      |   | X                       | Y             | Z             |
| 1    | O | -1.7529639130           | 0.0233125684  | 1.5167019251  |
| 2    | C | -0.5850693943           | 0.4532682360  | 1.4441634267  |
| 3    | C | 0.5850693943            | -0.4532682360 | 1.4441634267  |
| 4    | O | 1.7529639130            | -0.0233125684 | 1.5167019251  |
| 5    | C | 0.3268152617            | -1.9440814486 | 1.4534363233  |
| 6    | H | -0.7390076477           | -2.1664599950 | 1.3477113652  |
| 7    | H | 0.8999505452            | -2.3978471262 | 0.6342225228  |
| 8    | H | 0.6964442540            | -2.3587838305 | 2.4016095659  |
| 9    | C | -0.3268152617           | 1.9440814486  | 1.4534363233  |
| 10   | H | 0.7390076477            | 2.1664599950  | 1.3477113652  |
| 11   | H | -0.8999505452           | 2.3978471262  | 0.6342225228  |
| 12   | H | -0.6964442540           | 2.3587838305  | 2.4016095659  |
| 13   | H | 1.9518735616            | 0.9444818494  | -0.4681784793 |
| 14   | C | 1.4424647673            | 1.3263424800  | -1.3642348311 |
| 15   | H | 1.3743175231            | 2.4187950915  | -1.3478291856 |
| 16   | H | 2.0226667162            | 0.9909746143  | -2.2342045331 |
| 17   | C | 0.0528585033            | 0.7534115414  | -1.4481752280 |
| 18   | O | -0.9499318375           | 1.4422583872  | -1.6222605105 |
| 19   | C | -0.0528585033           | -0.7534115414 | -1.4481752280 |
| 20   | O | 0.9499318375            | -1.4422583872 | -1.6222605105 |
| 21   | C | -1.4424647673           | -1.3263424800 | -1.3642348311 |
| 22   | H | -1.3743175231           | -2.4187950915 | -1.3478291856 |
| 23   | H | -2.0226667162           | -0.9909746143 | -2.2342045331 |
| 24   | H | -1.9518735616           | -0.9444818494 | -0.4681784793 |

**Glyoxal trimer anion, (gl)<sub>3</sub><sup>-</sup> (C<sub>2h</sub> symmetry point group)**

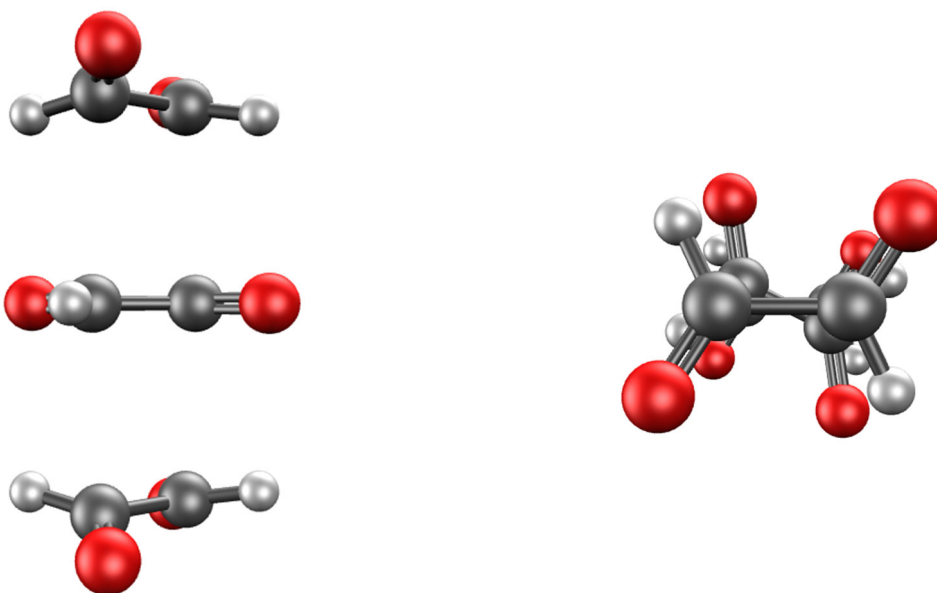

| ATOM | Coordinates (Angstroms) |               |               |
|------|-------------------------|---------------|---------------|
|      | X                       | Y             | Z             |
| 1 C  | -0.5886767908           | -0.4791577526 | 2.7994764194  |
| 2 C  | 0.5886767908            | 0.4791577526  | 2.7994764194  |
| 3 O  | -0.4391038375           | -1.6414268612 | 3.1041734970  |
| 4 H  | -1.5765426418           | -0.0220320001 | 2.5922247054  |
| 5 O  | 0.4391038375            | 1.6414268612  | 3.1041734970  |
| 6 H  | 1.5765426418            | 0.0220320001  | 2.5922247054  |
| 7 C  | 0.7088075889            | 0.1659074148  | 0.0000000000  |
| 8 C  | -0.7088075889           | -0.1659074148 | 0.0000000000  |
| 9 O  | 1.6302950633            | -0.6781177427 | 0.0000000000  |
| 10 H | 0.9231623340            | 1.2571482971  | 0.0000000000  |
| 11 O | -1.6302950633           | 0.6781177427  | 0.0000000000  |
| 12 H | -0.9231623340           | -1.2571482971 | 0.0000000000  |
| 13 C | -0.5886767908           | -0.4791577526 | -2.7994764194 |
| 14 C | 0.5886767908            | 0.4791577526  | -2.7994764194 |
| 15 O | -0.4391038375           | -1.6414268612 | -3.1041734970 |
| 16 H | -1.5765426418           | -0.0220320001 | -2.5922247054 |
| 17 O | 0.4391038375            | 1.6414268612  | -3.1041734970 |
| 18 H | 1.5765426418            | 0.0220320001  | -2.5922247054 |

**Biacetyl trimer anion, (ba)<sub>3</sub><sup>-</sup> (C<sub>2h</sub> symmetry point group)**

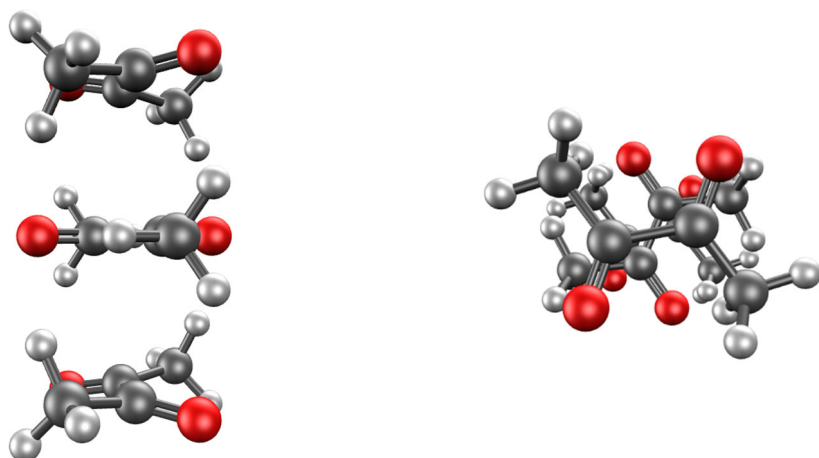

| Coordinates (Angstroms) |   |               |               |               |
|-------------------------|---|---------------|---------------|---------------|
| ATOM                    | X | Y             | Z             |               |
| 1                       | C | -1.0378582818 | -1.6598501687 | -2.8768399046 |
| 2                       | C | 0.1427161510  | -0.7554504523 | -3.0675485872 |
| 3                       | C | -0.1427161510 | 0.7554504523  | -3.0675485872 |
| 4                       | C | 1.0378582818  | 1.6598501687  | -2.8768399046 |
| 5                       | O | 1.2752946534  | -1.1410911854 | -3.2848371056 |
| 6                       | O | -1.2752946534 | 1.1410911854  | -3.2848371056 |
| 7                       | H | -0.7050840327 | -2.7002512387 | -2.9283060160 |
| 8                       | H | -1.7832643825 | -1.4430806457 | -3.6517974517 |
| 9                       | H | -1.5081966865 | -1.4354180189 | -1.9069650177 |
| 10                      | H | 0.7050840327  | 2.7002512387  | -2.9283060160 |
| 11                      | H | 1.7832643825  | 1.4430806457  | -3.6517974517 |
| 12                      | H | 1.5081966865  | 1.4354180189  | -1.9069650177 |
| 13                      | C | 0.6761627167  | -0.2839023032 | 0.0000000000  |
| 14                      | C | -0.6761627167 | 0.2839023032  | 0.0000000000  |
| 15                      | C | -0.8310547905 | 1.7907351824  | 0.0000000000  |
| 16                      | C | 0.8310547905  | -1.7907351824 | 0.0000000000  |
| 17                      | O | 1.7061666889  | 0.4379567512  | 0.0000000000  |
| 18                      | O | -1.7061666889 | -0.4379567512 | 0.0000000000  |
| 19                      | H | 0.1381483858  | 2.2982306366  | 0.0000000000  |
| 20                      | H | -1.4091451491 | 2.0838634349  | 0.8866280203  |
| 21                      | H | -1.4091451491 | 2.0838634349  | -0.8866280203 |
| 22                      | H | -0.1381483858 | -2.2982306366 | 0.0000000000  |
| 23                      | H | 1.4091451491  | -2.0838634349 | 0.8866280203  |
| 24                      | H | 1.4091451491  | -2.0838634349 | -0.8866280203 |
| 25                      | C | -1.0378582818 | -1.6598501687 | 2.8768399046  |
| 26                      | C | 0.1427161510  | -0.7554504523 | 3.0675485872  |
| 27                      | C | -0.1427161510 | 0.7554504523  | 3.0675485872  |
| 28                      | C | 1.0378582818  | 1.6598501687  | 2.8768399046  |
| 29                      | O | 1.2752946534  | -1.1410911854 | 3.2848371056  |
| 30                      | O | -1.2752946534 | 1.1410911854  | 3.2848371056  |
| 31                      | H | -0.7050840327 | -2.7002512387 | 2.9283060160  |
| 32                      | H | -1.7832643825 | -1.4430806457 | 3.6517974517  |
| 33                      | H | -1.5081966865 | -1.4354180189 | 1.9069650177  |
| 34                      | H | 0.7050840327  | 2.7002512387  | 2.9283060160  |
| 35                      | H | 1.7832643825  | 1.4430806457  | 3.6517974517  |
| 36                      | H | 1.5081966865  | 1.4354180189  | 1.9069650177  |

Glyoxal tetramer anion, (gl)<sub>4</sub><sup>-</sup> (*D*<sub>2</sub> symmetry point group)

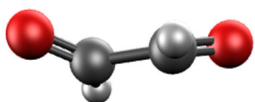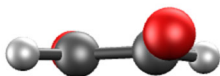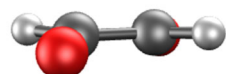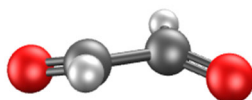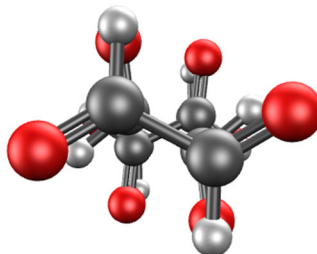

|      |   | Coordinates (Angstroms) |               |               |
|------|---|-------------------------|---------------|---------------|
| ATOM |   | X                       | Y             | Z             |
| 1    | C | 4.2885019711            | -0.6752245269 | 0.3556940144  |
| 2    | C | 4.2885019711            | 0.6752245269  | -0.3556940144 |
| 3    | O | 4.5562265041            | -1.6796764506 | -0.2554967657 |
| 4    | H | 4.1028068111            | -0.6503905203 | 1.4474579016  |
| 5    | O | 4.5562265041            | 1.6796764506  | 0.2554967657  |
| 6    | H | 4.1028068111            | 0.6503905203  | -1.4474579016 |
| 7    | C | 1.2987330496            | 0.6653675504  | -0.3298632480 |
| 8    | C | 1.2987330496            | -0.6653675504 | 0.3298632480  |
| 9    | O | 1.4465423432            | 0.8073635760  | -1.5430298816 |
| 10   | H | 1.2501166566            | 1.5255709294  | 0.3696920220  |
| 11   | O | 1.4465423432            | -0.8073635760 | 1.5430298816  |
| 12   | H | 1.2501166566            | -1.5255709294 | -0.3696920220 |
| 13   | C | -1.2987330496           | -0.6653675504 | -0.3298632480 |
| 14   | C | -1.2987330496           | 0.6653675504  | 0.3298632480  |
| 15   | O | -1.4465423432           | -0.8073635760 | -1.5430298816 |
| 16   | H | -1.2501166566           | -1.5255709294 | 0.3696920220  |
| 17   | O | -1.4465423432           | 0.8073635760  | 1.5430298816  |
| 18   | H | -1.2501166566           | 1.5255709294  | -0.3696920220 |
| 19   | C | -4.2885019711           | 0.6752245269  | 0.3556940144  |
| 20   | C | -4.2885019711           | -0.6752245269 | -0.3556940144 |
| 21   | O | -4.5562265041           | 1.6796764506  | -0.2554967657 |
| 22   | H | -4.1028068111           | 0.6503905203  | 1.4474579016  |
| 23   | O | -4.5562265041           | -1.6796764506 | 0.2554967657  |
| 24   | H | -4.1028068111           | -0.6503905203 | -1.4474579016 |

**Biacetyl tetramer anion, (ba)<sub>4</sub><sup>-</sup> (S<sub>4</sub> symmetry point group)**

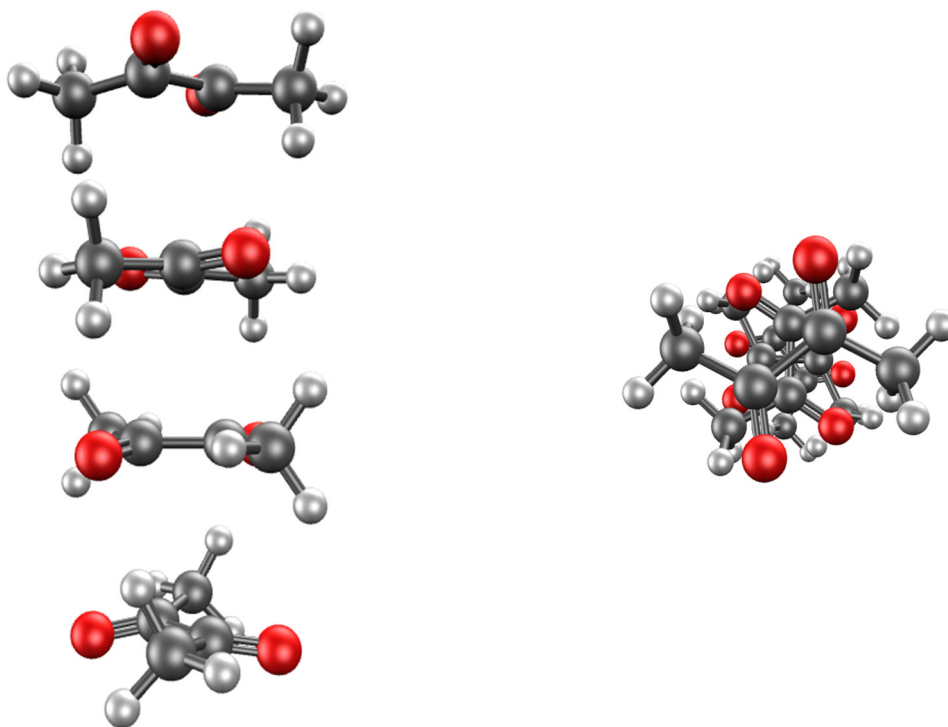

|      |   | Coordinates (Angstroms) |               |               |
|------|---|-------------------------|---------------|---------------|
| ATOM |   | X                       | Y             | Z             |
| 1    | C | 0.6146798299            | 0.4673166116  | 4.6266392433  |
| 2    | O | 0.4475330712            | 1.6518952168  | 4.8247412106  |
| 3    | C | 1.9513536900            | -0.1840640331 | 4.4365188895  |
| 4    | H | 2.7344112593            | 0.5766870795  | 4.4817799824  |
| 5    | H | 2.0908984480            | -0.9464230947 | 5.2124285640  |
| 6    | H | 1.9581289684            | -0.7093925889 | 3.4704207716  |
| 7    | C | -0.6146798299           | -0.4673166116 | 4.6266392433  |
| 8    | O | -0.4475330712           | -1.6518952168 | 4.8247412106  |
| 9    | C | -1.9513536900           | 0.1840640331  | 4.4365188895  |
| 10   | H | -2.7344112593           | -0.5766870795 | 4.4817799824  |
| 11   | H | -2.0908984480           | 0.9464230947  | 5.2124285640  |
| 12   | H | -1.9581289684           | 0.7093925889  | 3.4704207716  |
| 13   | C | 0.0189133149            | 0.7531614990  | 1.4654441020  |
| 14   | O | -1.0211748786           | 1.4119125893  | 1.5832393580  |
| 15   | C | -0.0189133149           | -0.7531614990 | 1.4654441020  |
| 16   | O | 1.0211748786            | -1.4119125893 | 1.5832393580  |
| 17   | C | 1.3648939235            | 1.4304079600  | 1.4210018306  |
| 18   | H | 2.1793640550            | 0.7042934134  | 1.3668255074  |
| 19   | H | 1.3995992892            | 2.0688407064  | 0.5299050447  |
| 20   | H | 1.4652439613            | 2.0627503201  | 2.3123176634  |
| 21   | C | -1.3648939235           | -1.4304079600 | 1.4210018306  |
| 22   | H | -2.1793640550           | -0.7042934134 | 1.3668255074  |
| 23   | H | -1.3995992892           | -2.0688407064 | 0.5299050447  |
| 24   | H | -1.4652439613           | -2.0627503201 | 2.3123176634  |
| 25   | C | 0.7531614990            | -0.0189133149 | -1.4654441020 |
| 26   | O | 1.4119125893            | 1.0211748786  | -1.5832393580 |
| 27   | C | -0.7531614990           | 0.0189133149  | -1.4654441020 |



|    |   |               |               |               |
|----|---|---------------|---------------|---------------|
| 28 | O | -1.4119125893 | -1.0211748786 | -1.5832393580 |
| 29 | C | 1.4304079600  | -1.3648939235 | -1.4210018306 |
| 30 | H | 0.7042934134  | -2.1793640550 | -1.3668255074 |
| 31 | H | 2.0627503201  | -1.4652439613 | -2.3123176634 |
| 32 | H | 2.0688407064  | -1.3995992892 | -0.5299050447 |
| 33 | C | -1.4304079600 | 1.3648939235  | -1.4210018306 |
| 34 | H | -0.7042934134 | 2.1793640550  | -1.3668255074 |
| 35 | H | -2.0627503201 | 1.4652439613  | -2.3123176634 |
| 36 | H | -2.0688407064 | 1.3995992892  | -0.5299050447 |
| 37 | C | 0.4673166116  | -0.6146798299 | -4.6266392433 |
| 38 | O | 1.6518952168  | -0.4475330712 | -4.8247412106 |
| 39 | C | -0.1840640331 | -1.9513536900 | -4.4365188895 |
| 40 | H | 0.5766870795  | -2.7344112593 | -4.4817799824 |
| 41 | H | -0.7093925889 | -1.9581289684 | -3.4704207716 |
| 42 | H | -0.9464230947 | -2.0908984480 | -5.2124285640 |
| 43 | C | -0.4673166116 | 0.6146798299  | -4.6266392433 |
| 44 | O | -1.6518952168 | 0.4475330712  | -4.8247412106 |
| 45 | C | 0.1840640331  | 1.9513536900  | -4.4365188895 |
| 46 | H | -0.5766870795 | 2.7344112593  | -4.4817799824 |
| 47 | H | 0.7093925889  | 1.9581289684  | -3.4704207716 |
| 48 | H | 0.9464230947  | 2.0908984480  | -5.2124285640 |
